# Supplementary material for: Incentivising doctor attendance in rural Bangladesh: a latent class analysis of a discrete choice experiment
Source: PubMed Central journal article supplement — BMJ Glob Health. 2021 Jul 29;6(7):e006001. doi: 10.1136/bmjgh-2021-006001 (PMC8323362; doi:10.1136/bmjgh-2021-006001), 2021-07-29
Supplement: bmjgh-2021-006001supp001.pdf [file bmjgh-2021-006001supp001.pdf]

## Supplementary Appendix

### Theoretical background to analysis

DCEs are theoretically based on random utility theory where independent rational actors act to maximise their individual utility [28]. We assume participants will choose the job that maximises their individual benefit or utility which depends on the attributes such that:

$$U(\text{Job A or Job B}) = \beta_1 * \text{Relationship} + \beta_2 * \text{Safety} + \beta_3 * \text{Punishment} + \beta_4 * \text{Promotion} + \beta_5 * \text{Education} + \beta_6 * \text{Incentive} + \varepsilon$$

Where:

Relationship = The relationship with the local community;

Safety = Whether there were active security guards and CCTV;

Punishment = The presence of disciplinary action for poor attendance;

Promotion = Good attendance considered in promotion and transfer decisions;

Education = Good attendance rewarded by bonus points for placement in further education;

Incentive = Incentive payment attached to the post.

For the opt-out choice, all attributes were coded as 0 such that  $U(\text{No job taken}) = 0$ .

### Model fit statistics for latent class models

| <b>Table S1 - Number of latent classes</b>         | <b>2</b> | <b>3</b> | <b>4</b> | <b>5</b> |
|----------------------------------------------------|----------|----------|----------|----------|
| Log-likelihood function                            | -3198.77 | -3059.78 | -3010.29 | -2972.52 |
| Pseudo R <sup>2</sup>                              | 0.212    | 0.246    | 0.259    | 0.268    |
| AIC                                                | 6427.5   | 6165.6   | 6082.6   | 6023     |
| AICc                                               | 6535.8   | 6331.5   | 6306.2   | 6304.4   |
| BIC                                                | 6520.8   | 6308.5   | 6275.2   | 6265.4   |
| Size of the smallest group (proportion of sample)  | 39.9%    | 20.8%    | 13.9%    | 7.5%     |
| Size of the smallest group (estimated respondents) | 123      | 64       | 43       | 23       |

AIC: Akaike information criterion

AICc: Akaike information criterion with a correction for finite sample sizes

BIC: Bayesian information criterion

## Estimated characteristics of latent class groups

| <b>Table S2 – General characteristics of estimated groups</b>                          | Group 1 | Group 2 | Group 3 |
|----------------------------------------------------------------------------------------|---------|---------|---------|
| Average age                                                                            | 34.2    | 33.2    | 33.1    |
| Proportion aged over 40                                                                | 10.77%  | 7.84%   | 11.35%  |
| Proportion female                                                                      | 47.69%  | 50.00%  | 43.26%  |
| Completed Postgraduate training                                                        | 15.38%  | 14.71%  | 12.77%  |
| Proportion with 2 or more kids                                                         | 47.69%  | 48.04%  | 33.33%  |
| Proportion who rated their financial situation over the past year as good or very good | 63.08%  | 54.90%  | 51.06%  |
| Proportion who responded professional network was important to promotion               | 32.31%  | 32.35%  | 28.37%  |
| Proportion who responded personal network was important to promotion                   | 20.00%  | 18.63%  | 26.95%  |
| Proportion who responded political network was important to promotion                  | 32.31%  | 32.35%  | 36.88%  |
| Proportion that experienced any challenge in their previous rural post                 | 98.46%  | 98.04%  | 100.00% |
| Proportion member of a professional association                                        | 71.88%  | 68.32%  | 79.14%  |
| Proportion who served their full rural placement without interruption                  | 80.00%  | 67.00%  | 76.81%  |

## Mixed multinomial results excluding respondents with postgraduate training

| <b>Table S3 – Results mixed multinomial logit model for sample excluding those with postgraduate education</b> |                    | McFadden's Pseudo R <sup>2</sup> = 0.27 |                |
|----------------------------------------------------------------------------------------------------------------|--------------------|-----------------------------------------|----------------|
| <b>Variable</b>                                                                                                | <b>Coefficient</b> | <b>Standard error</b>                   | <b>P-value</b> |
| Constant for not accepting either job                                                                          | 1.28***            | 0.16                                    | <0.01          |
| Supportive community                                                                                           | .97***             | 0.06                                    | <0.01          |
| Presence of security                                                                                           | .67***             | 0.05                                    | <0.01          |
| Disciplinary action for poor attendance                                                                        | -.64***            | 0.07                                    | <0.01          |
| Good attendance considered in promotion and transfer decisions                                                 | .67***             | 0.06                                    | <0.01          |
| Good attendance rewarded with bonus points for placement in higher education or training                       | .82***             | 0.07                                    | <0.01          |
| Incentive payment for posting (per 1% of base salary)                                                          | .06***             | <0.01                                   | <0.01          |
| <b>Estimated standard deviations for random parameters</b>                                                     |                    |                                         |                |
| Constant for not accepting either job                                                                          | 2.6***             | 0.17                                    | <0.01          |
| Supportive community                                                                                           | .64***             | 0.06                                    | <0.01          |
| Presence of security                                                                                           | .56***             | 0.05                                    | <0.01          |
| Disciplinary action for poor attendance                                                                        | .34***             | 0.10                                    | <0.01          |
| Good attendance considered in promotion and transfer decisions                                                 | 0.3***             | 0.10                                    | <0.01          |
| Good attendance rewarded with bonus points for placement in higher education or training                       | .17                | 0.11                                    | 0.11           |
| Incentive payment for posting (per 1% of base salary)                                                          | .03***             | <0.01                                   | <0.01          |
